# Supplementary figures and images for: Effect of bioaugmentation to enhance phytoremediation for removal of phenanthrene and pyrene from soil with Sorghum and Onobrychis sativa
Source: Springer Nature journal article supplement (doi:10.1186/2052-336x-12-24), 2014-01-09

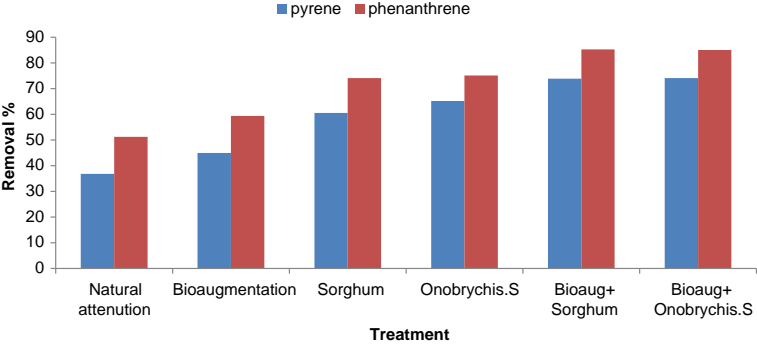

Supplement: 40201_2013_5154_MOESM1_ESM.pdf [file 40201_2013_5154_MOESM1_ESM.pdf]
